# Supplementary material for: Antiviral Effect of Ginsenosides rk1 against Influenza a Virus Infection by Targeting the Hemagglutinin 1-Mediated Virus Attachment
Source: MDPI journal article supplement (doi:10.3390/ijms24054967), 2023-03-04
Supplement: s1 [file s1]

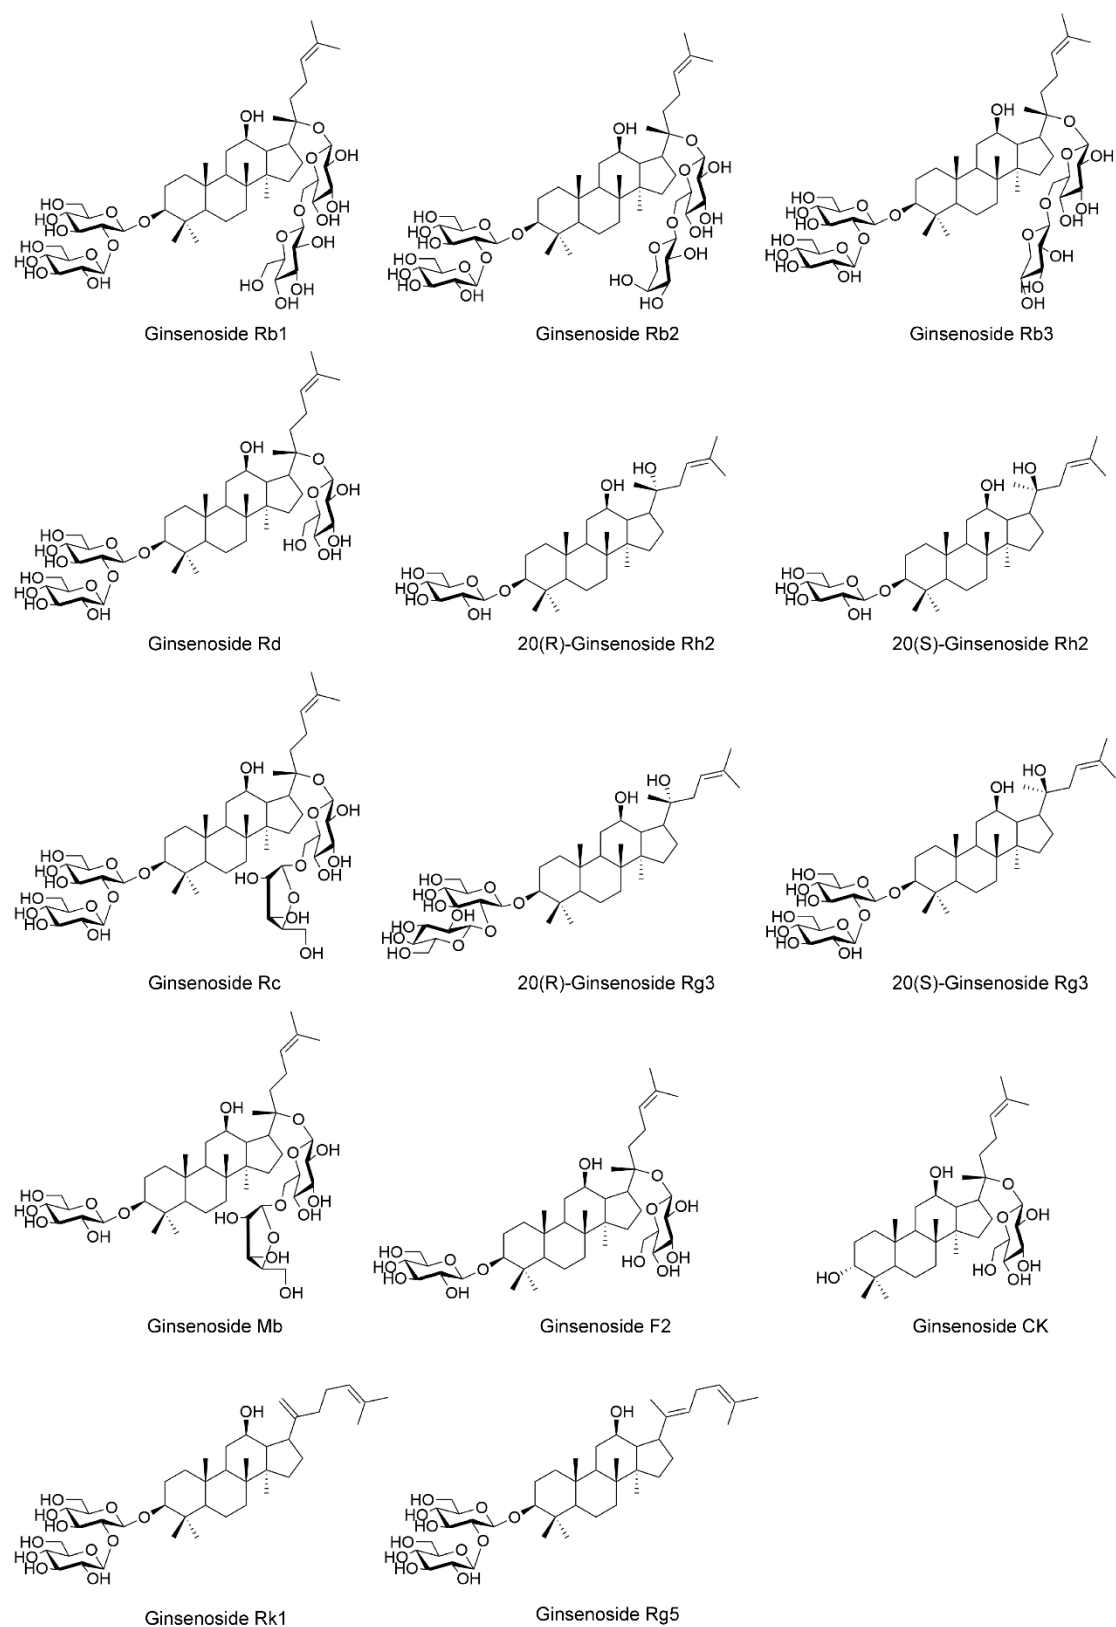

**Figure S1.** Chemical structures of protopanaxadiol saponins (PPD).

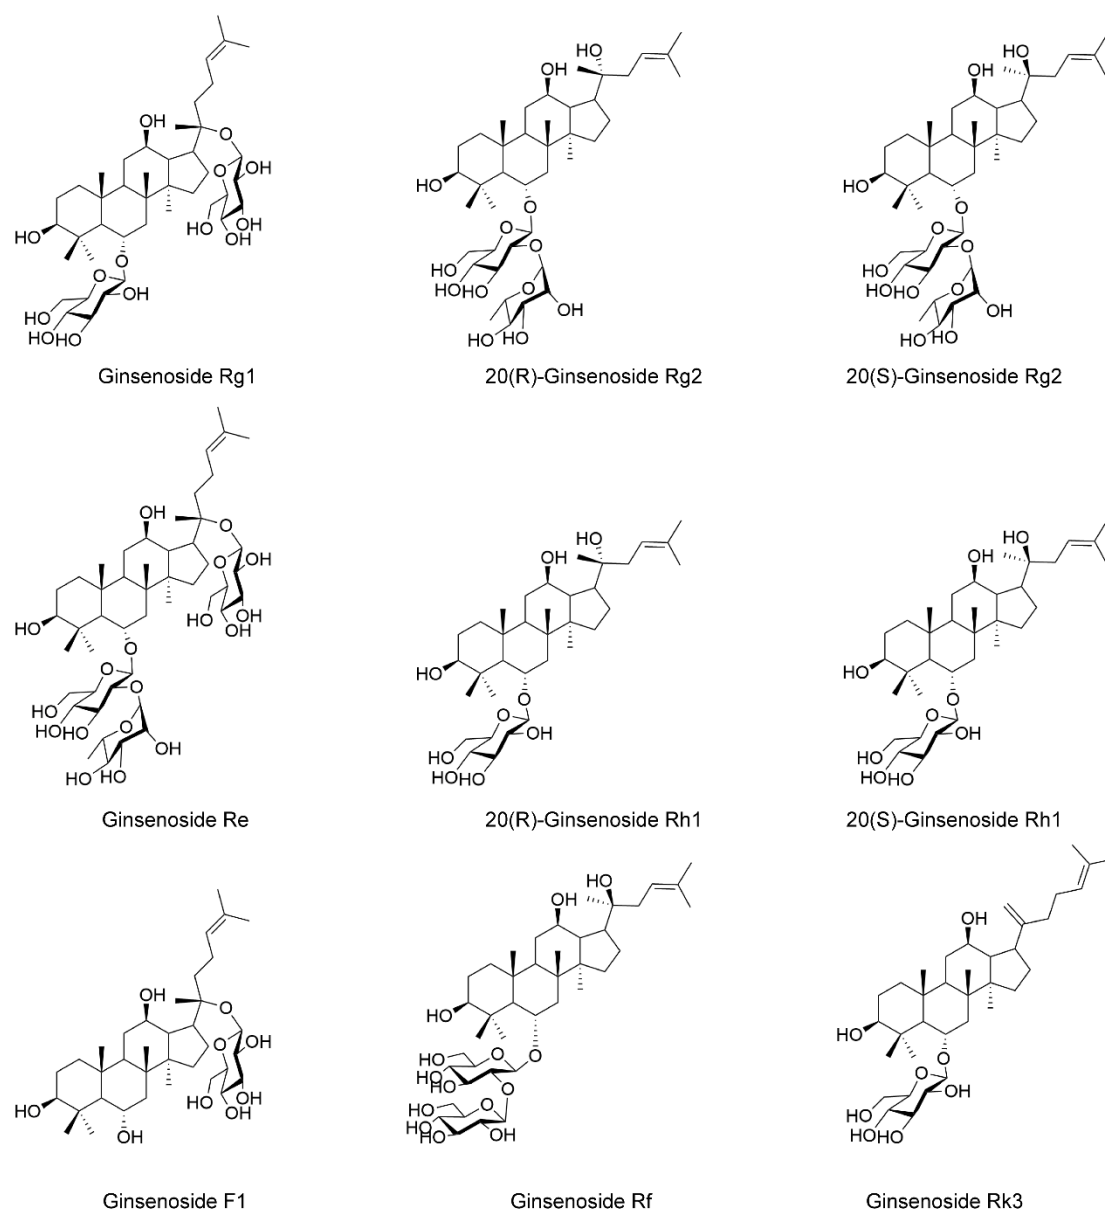

**Figure S2.** Chemical structures of protopanaxatriol saponins (PPT).

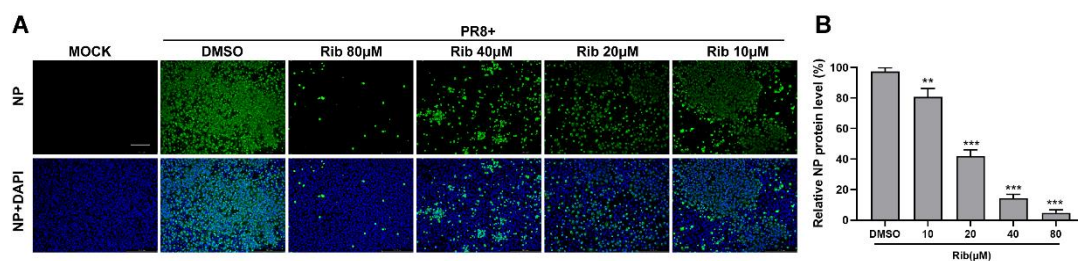

**Figure S3.** The antiviral effect of ribavirin against PR8 virus replication. A549 cells were infected with PR8 virus (0.1 MOI) for 2 h at 37°C and then cultured in fresh medium containing ribavirin. At 24 hpi, the cells were subjected to IFA. Representative IFA images are shown in **A**. Scale bar: 250 μm. Results shown in **B** are normalized NP protein levels based on the percentage of infected cell counts among total cell counts. Statistical significances are denoted by \*\* $p < 0.01$  and \*\*\* $p < 0.001$  compared to DMSO groups.

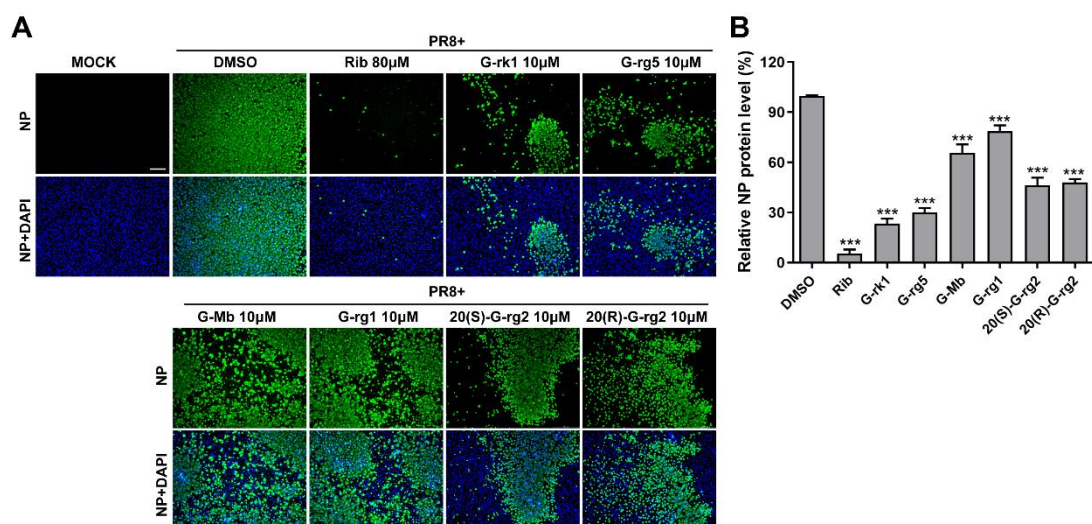

**Figure S4.** Antiviral activities of different Ginsenosides against PR8 (H1N1) infection in A549 cells. Cells grown in 96-well plates were infected with PR8 strain (0.1 MOI) for 2 h at 37°C and then cultured in fresh medium containing 10  $\mu$ M of ginsenosides or 80  $\mu$ M of ribavirin (Rib). At 24 hpi, the cells were fixed with paraformaldehyde and the viral NP expression was detected by indirect immunofluorescence assay (IFA) (A). Scale bar: 250  $\mu$ m. Results are normalized NP protein levels based on the percentage of infected cell counts among total cell counts (B). Statistical significances are denoted by \*\*\* $p$  < 0.001 compared to DMSO control.

**Table S1.** Cellular toxicity and inhibitory effects of G-Mb, G-rg1, 20(S)-G-rg2, 20(R)-G-rg2 and Rib against IAV PR8 in A549 cells.

| Compounds   | <sup>a</sup> CC <sub>50</sub> ( $\mu$ M) | <sup>b</sup> EC <sub>50</sub> ( $\mu$ M) | <sup>c</sup> SI |
|-------------|------------------------------------------|------------------------------------------|-----------------|
| G-Mb        | 41.0                                     | >20                                      | <2.05           |
| G-rg1       | 36.9                                     | >10                                      | <3.7            |
| 20(S)-G-rg2 | 37.87                                    | 15.6                                     | 2.43            |
| 20(R)-G-rg2 | 33.6                                     | >10                                      | <3.4            |
| Rib         | >300                                     | 17.3                                     | >17.3           |

<sup>a</sup> CC<sub>50</sub> is a concentration needed to cut normal cell viability by 50%; <sup>b</sup> EC<sub>50</sub> is a concentration needed to protect 50% of cells from IAV infection; <sup>c</sup> SI (selectivity index) is the ratio of CC<sub>50</sub> to EC<sub>50</sub>.

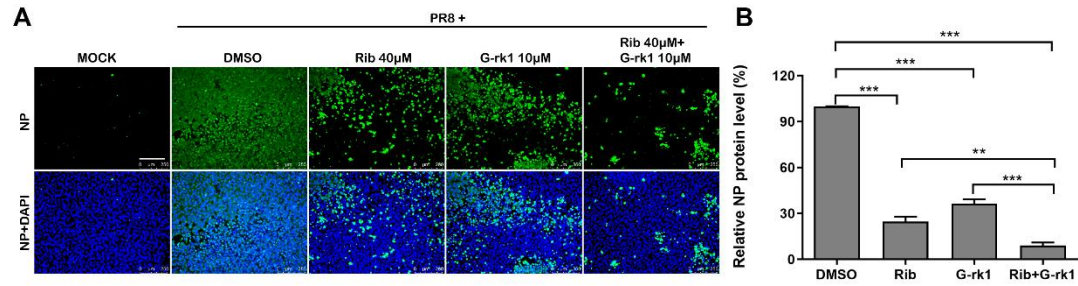

**Figure S5.** The synergistic effect of G-rk1 and ribavirin against PR8 virus replication. A549 cells were infected with PR8 virus (0.1 MOI) for 2 h at 37°C and then cultured in fresh medium containing G-rk1 or ribavirin or their combination. At 24 hpi, the cells were analyzed by IFA. Representative IFA images from one of the three independent experiments are shown in **A**. Scale bar: 250 µm. Results shown in **B** are normalized NP protein levels based on the percentage of infected cell counts among total cell counts. Statistical significances are denoted by \*\* $p < 0.01$  and \*\*\* $p < 0.001$  between indicated groups.

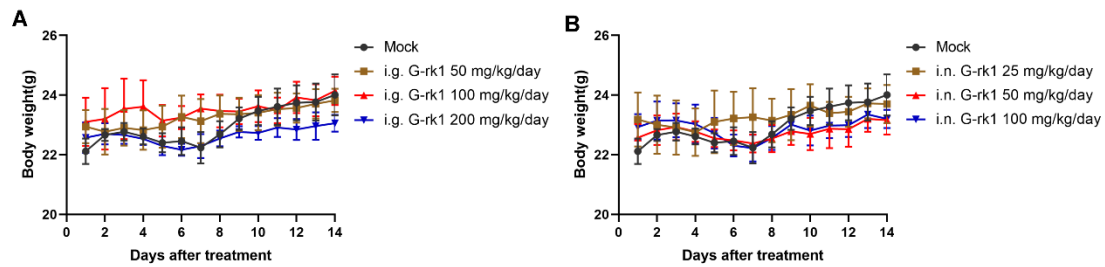

**Figure S6.** Toxicity of G-rk1 in mice by intragastric administration (i.g.) (**A**) and intranasal inoculation (i.n.) (**B**), respectively. BALB/C mice ( $n = 8$ ) were treated with G-rk1 once daily for 6 consecutive days. Body weights in each group were monitored daily for up to 14 days after the first treatment.
